# Supplementary material for: Oral and anal high-risk human papilloma virus infection in HIV-positive men who have sex with men over a 24-month longitudinal study: complexity and vaccine implications
Source: Springer Nature journal article supplement (doi:10.1186/s12889-019-7004-x), 2019-05-28
Supplement: MOESM1 [file 16755980]

**Additional file 1.** Description of HR-HPV genotypes in oral and anal samples at baseline and at follow-up. Data are reported according to the number of HR-HPV genotypes detected and to the relative frequency of each specific combination within the group.

a) oral samples at baseline

| HR-HPV genotype/s        | Patients (n) | Percentage respect to the 106 patients tested | Relative frequency |
|--------------------------|--------------|-----------------------------------------------|--------------------|
| 1 HR-HPV detected (n=10) |              |                                               |                    |
| 16                       | 3            | 2.83                                          | 30                 |
| 18                       | 1            | 0.94                                          | 10                 |
| 35                       | 1            | 0.94                                          | 10                 |
| 56                       | 1            | 0.94                                          | 10                 |
| 31                       | 1            | 0.94                                          | 10                 |
| 51                       | 1            | 0.94                                          | 10                 |
| 58                       | 1            | 0.94                                          | 10                 |
| 59                       | 1            | 0.94                                          | 10                 |

b) anal samples at baseline

| HR-HPV genotype/s        | Patients (n) | Percentage respect to the 165 patients tested | Relative frequency |
|--------------------------|--------------|-----------------------------------------------|--------------------|
| 1 HR-HPV detected (n=59) |              |                                               |                    |
| 52                       | 14           | 8.48                                          | 23.7               |
| 16                       | 11           | 6.67                                          | 18.6               |
| 18                       | 6            | 3.64                                          | 10.2               |
| 45                       | 6            | 3.64                                          | 10.2               |
| 51                       | 5            | 3.03                                          | 8.5                |
| 35                       | 4            | 2.42                                          | 6.8                |
| 33                       | 3            | 1.82                                          | 5.1                |
| 39                       | 3            | 1.82                                          | 5.1                |
| 56                       | 3            | 1.82                                          | 5.1                |
| 59                       | 2            | 1.21                                          | 3.4                |
| 31                       | 1            | 0.61                                          | 1.7                |
| 58                       | 1            | 0.61                                          | 1.7                |
| 2 HR-HPV detected (n=30) |              |                                               |                    |
| 16-45                    | 3            | 1.82                                          | 10                 |
| 16-18                    | 2            | 1.21                                          | 6.7                |
| 16-51                    | 2            | 1.21                                          | 6.7                |
| 18-31                    | 2            | 1.21                                          | 6.7                |
| 18-51                    | 2            | 1.21                                          | 6.7                |
| 33-58                    | 2            | 1.21                                          | 6.7                |
| 39-51                    | 2            | 1.21                                          | 6.7                |
| 51-52                    | 2            | 1.21                                          | 6.7                |
| 16-31                    | 1            | 0.61                                          | 3.3                |

|                          |   |      |      |
|--------------------------|---|------|------|
| 18-52                    | 1 | 0.61 | 3.3  |
| 18-56                    | 1 | 0.61 | 3.3  |
| 31-45                    | 1 | 0.61 | 3.3  |
| 31-51                    | 1 | 0.61 | 3.3  |
| 31-52                    | 1 | 0.61 | 3.3  |
| 31-58                    | 1 | 0.61 | 3.3  |
| 33-39                    | 1 | 0.61 | 3.3  |
| 39-45                    | 1 | 0.61 | 3.3  |
| 45-51                    | 1 | 0.61 | 3.3  |
| 45-56                    | 1 | 0.61 | 3.3  |
| 51-59                    | 1 | 0.61 | 3.3  |
| 52-56                    | 1 | 0.61 | 3.3  |
| 3 HR-HPV detected (n=16) |   |      |      |
| 16-18-45                 | 1 | 0.61 | 6.2  |
| 16-31-33                 | 1 | 0.61 | 6.2  |
| 16-31-39                 | 1 | 0.61 | 6.2  |
| 16-31-51                 | 1 | 0.61 | 6.2  |
| 16-33-56                 | 1 | 0.61 | 6.2  |
| 16-39-51                 | 1 | 0.61 | 6.2  |
| 16-45-56                 | 1 | 0.61 | 6.2  |
| 16-56-58                 | 1 | 0.61 | 6.2  |
| 18-31-51                 | 1 | 0.61 | 6.2  |
| 18-35-52                 | 1 | 0.61 | 6.2  |
| 18-39-51                 | 1 | 0.61 | 6.2  |
| 18-45-52                 | 1 | 0.61 | 6.2  |
| 35-45-59                 | 1 | 0.61 | 6.2  |
| 35-52-56                 | 1 | 0.61 | 6.2  |
| 39-51-52                 | 1 | 0.61 | 6.2  |
| 45-51-52                 | 1 | 0.61 | 6.2  |
| 4 HR-HPV detected (n=3)  |   |      |      |
| 16-31-35-59              | 1 | 0.61 | 33.3 |
| 18-31-33-56              | 1 | 0.61 | 33.3 |
| 18-51-52-56              | 1 | 0.61 | 33.3 |

c) oral samples at follow-up (24 months after baseline)

| HR-HPV genotype          | Patients (n) | Percentage respect to the 162 patients tested | Relative frequency |
|--------------------------|--------------|-----------------------------------------------|--------------------|
| 1 HR-HPV detected (n=11) |              |                                               |                    |
| 16                       | 3            | 1.8                                           | 27.3               |
| 56                       | 2            | 1.2                                           | 18.2               |
| 59                       | 2            | 1.2                                           | 18.2               |
| 33                       | 1            | 0.6                                           | 9.1                |
| 35                       | 1            | 0.6                                           | 9.1                |
| 45                       | 1            | 0.6                                           | 9.1                |

|    |   |     |     |
|----|---|-----|-----|
| 58 | 1 | 0.6 | 9.1 |
|----|---|-----|-----|

d) anal samples at follow-up (24 months after baseline)

| HR-HPV genotype/s        | Patients (n) | Percentage respect to the 165 patients tested | Relative frequency |
|--------------------------|--------------|-----------------------------------------------|--------------------|
| 1 HR-HPV detected (n=56) |              |                                               |                    |
| 45                       | 10           | 6.06                                          | 17.8               |
| 52                       | 8            | 4.85                                          | 14.3               |
| 16                       | 7            | 4.24                                          | 12.5               |
| 59                       | 6            | 3.64                                          | 10.7               |
| 33                       | 5            | 3.03                                          | 8.9                |
| 51                       | 5            | 3.03                                          | 8.9                |
| 58                       | 5            | 3.03                                          | 8.9                |
| 31                       | 3            | 1.81                                          | 5.3                |
| 18                       | 2            | 1.21                                          | 3.6                |
| 35                       | 2            | 1.21                                          | 3.6                |
| 39                       | 2            | 1.21                                          | 3.6                |
| 56                       | 1            | 0.61                                          | 1.8                |
| 2 HR-HPV detected (n=16) |              |                                               |                    |
| 16-52                    | 2            | 1.21                                          | 12.5               |
| 16-51                    | 1            | 0.61                                          | 6.2                |
| 18-31                    | 1            | 0.61                                          | 6.2                |
| 18-33                    | 1            | 0.61                                          | 6.2                |
| 18-39                    | 1            | 0.61                                          | 6.2                |
| 18-51                    | 1            | 0.61                                          | 6.2                |
| 31-35                    | 1            | 0.61                                          | 6.2                |
| 33-51                    | 1            | 0.61                                          | 6.2                |
| 33-52                    | 1            | 0.61                                          | 6.2                |
| 39-45                    | 1            | 0.61                                          | 6.2                |
| 45-51                    | 1            | 0.61                                          | 6.2                |
| 45-58                    | 1            | 0.61                                          | 6.2                |
| 52-56                    | 1            | 0.61                                          | 6.2                |
| 52-58                    | 1            | 0.61                                          | 6.2                |
| 52-59                    | 1            | 0.61                                          | 6.2                |
| 3 HR-HPV detected (n=21) |              |                                               |                    |
| 16-31-39                 | 2            | 1.21                                          | 9.5                |
| 16-51-52                 | 2            | 1.21                                          | 9.5                |
| 18-51-52                 | 2            | 1.21                                          | 9.5                |
| 16-18-31                 | 1            | 0.61                                          | 4.8                |
| 16-18-58                 | 1            | 0.61                                          | 4.8                |
| 16-31-33                 | 1            | 0.61                                          | 4.8                |
| 16-31-52                 | 1            | 0.61                                          | 4.8                |
| 16-31-59                 | 1            | 0.61                                          | 4.8                |
| 16-39-51                 | 1            | 0.61                                          | 4.8                |

|                         |   |      |      |
|-------------------------|---|------|------|
| 16-51-58                | 1 | 0.61 | 4.8  |
| 16-52-59                | 1 | 0.61 | 4.8  |
| 18-33-35                | 1 | 0.61 | 4.8  |
| 18-52-59                | 1 | 0.61 | 4.8  |
| 31-33-51                | 1 | 0.61 | 4.8  |
| 31-33-56                | 1 | 0.61 | 4.8  |
| 31-51-56                | 1 | 0.61 | 4.8  |
| 31-52-58                | 1 | 0.61 | 4.8  |
| 35-51-52                | 1 | 0.61 | 4.8  |
| 4 HR-HPV detected (n=7) |   |      |      |
| 16-18-33-51             | 1 | 0.61 | 14.3 |
| 16-18-39-51             | 1 | 0.61 | 14.3 |
| 16-45-51-52             | 1 | 0.61 | 14.3 |
| 16-45-51-58             | 1 | 0.61 | 14.3 |
| 16-45-52-56             | 1 | 0.61 | 14.3 |
| 18-31-35-45             | 1 | 0.61 | 14.3 |
| 18-35-45-58             | 1 | 0.61 | 14.3 |
| 5 HR-HPV detected (n=3) |   |      |      |
| 16-31-35-52-59          | 1 | 0.61 | 33.3 |
| 16-33-52-56-59          | 1 | 0.61 | 33.3 |
| 18-31-51-52-58          | 1 | 0.61 | 33.3 |

HR-HPV: high risk HPV  
 HPV: Human papillomavirus
